# Supplementary material
Source: Springer Nature journal article supplement (https://www.springermedizin.de/resource/supplementary/13075_2010_3220_MOESM2_ESM.pdf/9694004)

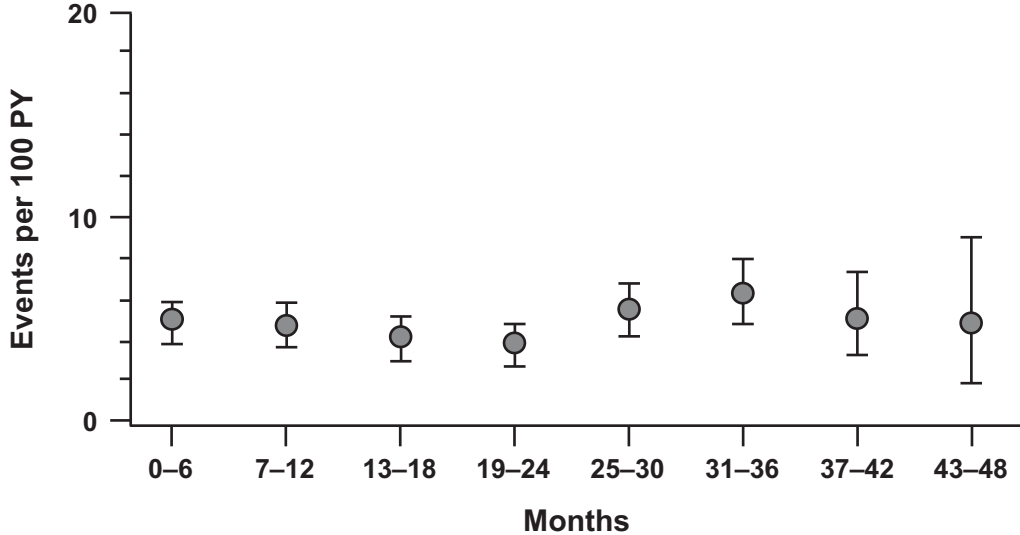

|           |      |      |      |      |      |     |     |     |
|-----------|------|------|------|------|------|-----|-----|-----|
| Events, n | 85   | 77   | 62   | 53   | 68   | 59  | 26  | 8   |
| PY        | 1805 | 1664 | 1542 | 1440 | 1290 | 964 | 528 | 173 |

Supplement: MOESM2 [file 9694004]
